1 **Title: Resistance to EGFR inhibitors in lung cancer occurs through horizontal**  
2 **transfer and is associated with increased caveolins expression**

3  
4 **Authors:** Susana Junqueira-Neto<sup>1,2,3</sup>, Ana R. Oliveira<sup>1,2,3</sup>, Joana F. Marques<sup>1,2</sup>, Patrícia Oliveira<sup>2</sup>,  
5 Maria G. Fernandes<sup>1,2,3,4</sup>, Venceslau Hespanhol<sup>1,2,3,4</sup>, Ana Barroso<sup>5</sup>, Jorge Pinheiro<sup>6</sup>, Conceição  
6 Souto-Moura<sup>3,6</sup>, Bruno Cavadas<sup>1,2</sup>, Luísa Pereira<sup>1,2,3</sup>, Bárbara Adem<sup>1,2</sup>, Miguel Silva<sup>1</sup>, Sónia A.  
7 Melo<sup>1,2,3</sup>, José L. Costa<sup>1,2,3</sup>, José C. Machado<sup>1,2,3,\*</sup>

8  
9 **Affiliations:**

10 <sup>1</sup> i3S Instituto de Investigação e Inovação em Saúde, University of Porto; 4200-135 Porto, Portugal

11 <sup>2</sup>IPATIMUP Institute of Molecular Pathology and Immunology, University of Porto; 4200-135  
12 Porto, Portugal

13 <sup>3</sup>FMUP Faculty of Medicine, University of Porto; 4200-319 Porto, Portugal

14 <sup>4</sup>Pulmonology Department, Centro Hospitalar Universitário de São João; 4200-319 Porto, Portugal

15 <sup>5</sup>Thoracic Tumors Multidisciplinary Unit, Pulmonology Department, Vila Nova de Gaia-Espinho  
16 Hospital Center; 4434-502 Vila Nova de Gaia, Portugal

17 <sup>6</sup>Pathology Department, Centro Hospitalar Universitário de São João; 4200-319 Porto, Portugal

18 \*Corresponding author. Email: [josem@ipatimup.pt](mailto:josem@ipatimup.pt)

19

20 **Abstract:**

21 Resistance to treatment is a major clinical problem and a major cause of cancer-related deaths.  
22 Understanding the biological basis of resistance acquisition is of utmost importance to improve  
23 the clinical management of cancer patients. NGS analysis of human lung cancer (LC) tumors from  
24 patients that relapsed after treatment with EGFR-tyrosine kinase inhibitors (TKI), revealed that the  
25 p.T790M resistance mutation is not present in all the relapsing tumor cells, suggesting that LC  
26 cells can become resistant even if not carrying the p.T790M mutation. Using in vitro treatments  
27 with conditioned medium (CM) and in vivo co-inoculation experiments, we show that LC cells  
28 sensitive to EGFR-TKIs (S cells) acquire resistance faster when treated with CM from LC cells  
29 resistant to EGFR-TKIs (R cells) or when co-inoculated with R cells in opposite flanks of the same  
30 animal. Importantly, we show that acquisition of resistance is not due to the emergence of  
31 subpopulations of cancer cells with new resistance mutations. Using transcriptomics, we show that  
32 acquisition of resistance is associated with upregulation of genes involved in endocytosis, namely  
33 caveolins CAV1 and CAV2. These findings were validated in human clinical samples, where an  
34 increase in CAV1 and CAV2 expression was associated with tumor relapse after treatment with  
35 EGFR-TKIs. Our results suggest that acquisition of resistance to targeted therapies results from  
36 the combined effect of selection of cells harboring specific resistance mutations and horizontal  
37 transfer of the resistance phenotype. These findings may pave the way to bring intercellular  
38 communication into the realm of cancer treatment.

39

40 **One Sentence Summary:** Resistance to EGFR inhibitors is transferred horizontally between lung  
41 cancer cells and is associated with gain of expression of caveolins.

42 **Main Text:**

43 **INTRODUCTION**

44 Targeted cancer therapies block specific signalling pathways implicated in proliferation and  
45 survival of cancer cells (1, 2). Despite increasing progression-free and overall survival of cancer  
46 patients, resistance to these drugs is almost universally observed (3). Thus, acquired resistance to  
47 therapy is a major clinical problem and a cause of therapy failure (4). Acquisition of resistance to  
48 targeted therapies is currently explained by the selective accumulation of cancer cells carrying  
49 resistance-conferring mutations (5, 6). However, data on record sustain that cell division and  
50 selection cannot by itself explain the speed at which a tumour becomes clinically resistant (7, 8).  
51 A study about disease progression of a melanoma patient with the BRAF p.V600E mutation is a  
52 paradigmatic example (9). Furthermore, clinical data suggests that in lung cancer (LC) patients  
53 who relapse after EGFR tyrosine kinase inhibitor (TKI) treatment, cells that carry and cells that do  
54 not carry a specific resistance-conferring mutation may coexist in a treatment-resistant tumour (10,  
55 11). Hence, acquisition of resistance to targeted therapies may be influenced by mechanisms of  
56 horizontal transfer, complementing a vertical transfer model entirely dependent on cell division  
57 and selection of cells carrying resistance mutations.

58 Lung cancer is a prototypical model of successful use of targeted therapies, where EGFR kinase  
59 domain mutations hyperactivate and confer dependency on the EGFR oncogenic pathway for cell  
60 survival (12, 13). Treatment of EGFR-mutant LC with EGFR-TKIs leads to successful clinical  
61 response in many patients (14, 15). Despite initial benefit, disease progression typically develops  
62 after 9-12 months of treatment, because of the recurrent EGFR mutation p.T790M in 50-60% of  
63 cases (16-18). The p.T790M mutation increases the affinity of EGFR to adenosine triphosphate,  
64 relative to its affinity to TKIs (19). Resistance to EGFR-TKI therapy may also be achieved through

65 mutations in other genes, such as MET and ERBB2 (20, 21), showing that therapy resistance does  
66 not depend solely on interference with drug activity, but may elapse also from alternative cell  
67 signalling cues. Therefore, LC constitutes a prime model to address the issue of resistance  
68 acquisition to targeted therapies, given that both sensitivity and resistance-conferring mechanisms  
69 have been identified.

70 We show that LC cells that do not carry known EGFR-TKI resistance mutations, acquire resistance  
71 to erlotinib faster when in the presence of LC cells that carry the p.T790M EGFR mutation. We  
72 also show that acquisition of resistance is associated with increased expression of the endocytosis  
73 associated proteins CAV1 and CAV2. Our study provides novel insight on how therapy resistance  
74 becomes a predominant phenotype in cancer and shows that widespread expression of a therapy  
75 resistance phenotype is not strictly dependent on division and selection of subpopulations of cancer  
76 cells carrying resistance triggering mutations.

77

78 **RESULTS**

79 **Human lung cancers present the p.T790M resistance mutation only in a fraction of the**  
80 **relapsing tumour cells**

81 Studies that characterize the EGFR sensitizing and resistance mutations (*10, 11*), show that in some  
82 patients the allele frequency (AF) of the initial sensitizing mutation is higher than that of the  
83 resistance-conferring mutation. This suggests the resistance mutation is present only in a fraction  
84 of the relapsing tumour cells. Because this had never been studied in a systematic way, we used  
85 an NGS panel to analyse a series of 28 samples, including 14 liquid and 14 tissue biopsies (table  
86 1), from LC patients who relapsed after EGFR-TKI treatment and where the p.T790M resistance  
87 mutation was detected.

88 The AF of the initial sensitizing EGFR mutation was always higher than that of the p.T790M  
89 mutation in the relapsing tumours, except for one case (table 1 and Fig. S1,  $P < 0.0001$ ). On average,  
90 the AF of the initial mutation was 3.2-fold higher than that of the p.T790M mutation, irrespective  
91 of the sample being a liquid or tissue biopsy and irrespective of the type of initial EGFR mutation,  
92 namely being a point mutation or an indel, which could affect read counting and comparison using  
93 NGS. No additional EGFR-TKI resistance mutations in any of the genes analysed were detected  
94 in these cases, excluding co-occurrence of resistance mutations as the cause for p.T790M-  
95 independent resistance. Likewise, no CNVs in EGFR were detected, excluding ploidy as the cause  
96 for observed differences in AF.

97 The fact that in human LC we frequently observe a lower AF for the p.T790M mutation in  
98 comparison with the sensitizing mutation in the same tumour, suggests that a fraction of the cancer  
99 cells “borrow” their resistance phenotype from cells that carry the p.T790M mutation. Our results

100 suggest that the fraction of cancer cells that do not carry the resistance mutation may be higher  
101 than 90% in some tumors (table 1).

102

### 103 **Resistant cells accelerate *in vitro* acquisition of resistance by sensitive cells to EGFR-TKI**

104 Since cancer cells can display an EGFR-TKI resistant phenotype without necessarily carrying a  
105 resistance mutation, we assessed whether resistant cells could influence acquisition of resistance  
106 to EGFR-TKI by sensitive cells *in vitro*. We used the erlotinib-sensitive LC cell line HCC827 (S  
107 cells) that harbours the sensitizing EGFR p.E746-A750del mutation, and the erlotinib-resistant LC  
108 cell line H1975 (R cells) that harbours both a sensitizing and a resistance mutation (EGFR p.L858R  
109 and p.T790M, respectively).

110 S cells treated with CM from R cells (Fig. 1A) achieved resistance faster in comparison to non-  
111 treated S cells (90±3 vs. 120±5 days, P=0.0009, Fig. 1B). Follow-up of S cells that acquired  
112 resistance and were further kept under erlotinib treatment only, shows that once the resistance  
113 phenotype is acquired, cells maintained a stable resistance phenotype until we stopped follow-up  
114 at 55 days.

115 Genetic analysis of DNA from S cells revealed that the p.T790M mutation, present in R cells,  
116 could not be detected in S cell cultures, confirming that no cell contamination occurred, and  
117 suggesting that acquisition of resistance to erlotinib in S cells is not strictly dependent on the  
118 presence of the p.T790M mutation (Fig. 1C).

119

### 120 **Resistant cells accelerate *in vivo* acquisition of resistance by sensitive cells to EGFR-TKI**

121 To evaluate whether R cells could influence acquisition of resistance to EGFR-TKI by S cells *in*  
122 *vivo*, we used a strategy of single (SI) or dual inoculation (DI) of LC cells in Rag2<sup>-/-</sup>;IL2rg<sup>-/-</sup>

123 immunodeficient mice (Fig. 2A). Our results show that S tumours in DI (S and R cells) mice  
124 acquire resistance significantly faster in comparison to SI (S cells only) mice ( $78\pm 5$  vs.  $132\pm 16$   
125 days,  $P=0.0006$ , Fig. 2B and 2C), which is reflected in a significant decrease in progression-free  
126 survival in the DI group (Fig. 2D,  $P=0.001$ ). S tumours with acquired resistance to erlotinib were  
127 transplanted into new mice for two passages, always under erlotinib treatment, and maintained the  
128 ability to grow (Fig. 2E), reinforcing the *in vitro* observation that acquisition of resistance results  
129 in a stable phenotype.

130 To discard the possibility that migrating R cells could explain the acquisition of resistance to  
131 erlotinib in S tumors, we performed genetic analysis. Short tandem repeat (STR) profiling of S and  
132 R cells, and of S tumours from DI animals showed a perfect overlap between the profile of S  
133 tumours and S cells (Fig. 2F). To maximize the sensitivity of detection of potential migrating R  
134 cells, we also performed digital PCR for the TP53 p.R273H mutation that is present in R cells with  
135 an AF of 100% and could not detect it in S tumours (Fig. 2G). Histology analysis of R and S  
136 tumours also shows distinct morphological patterns compatible with distinct cellular origin of the  
137 tumours (Fig. S2).

138 Using NGS, we identified the EGFR p.E746\_A750del mutation in every S tumour from DI animals  
139 with an allelic frequency (AF) similar to that of the parental S cell line ( $\approx 90\%$ ; table S1). In  
140 contrast, the p.T790M mutation is detected only in 6 out of 20 tumours and always with very low  
141 AF ( $\approx 0.1\%$ ). These results were confirmed by dPCR (Fig. 3A) and corroborate the *in vitro*  
142 observation that acquisition of resistance to erlotinib in S tumors is not dependent on the presence  
143 of the p.T790M mutation. The vestigial AF of p.T790M is most likely the result of circulating  
144 cfDNA derived from R cells growing in the opposite flank of the mice since we could not detect  
145 the p.T790M mutation in any of the S tumours from SI animals (table S1). To verify this, we

146 analyzed liquid biopsies from mice where R cells had been inoculated and confirmed that the  
147 p.T790M mutation can indeed be detected in circulating cfDNA (Fig. 3B).

148 To verify whether other mutations that confer resistance to EGFR-TKIs were present in resistant  
149 tumours, we used an NGS panel encompassing all known resistance mutations, including point  
150 mutations in EGFR, KRAS, NRAS, BRAF and PIK3CA, and CNVs in HER2, MET and BRAF.  
151 No additional point mutations were identified. Interestingly, in S tumours from SI animals we  
152 identified HER2 or MET amplification in 70% of the cases (6 and 1, respectively), indicating that  
153 mutation-driven resistance is a prevalent mechanism in these tumours (Fig. 3C). However, in S  
154 tumours from DI animals, only MET amplification was found and only in two cases (10%, Fig.  
155 3C). These results suggest that mutation-driven resistance, through the EGFR p.T790M or any  
156 other known EGFR-TKI resistance mutation, is not prevalent in S tumours that acquire resistance  
157 to erlotinib in DI mice.

158

### 159 **Caveolins are overexpressed in tumours from DI animals that acquire resistance to EGFR-** 160 **TKI**

161 Since the presence of resistance mutations does not seem to be a pre-requisite for acquisition of  
162 resistance to erlotinib in S tumors from DI animals, we sought to identify what differentiates S  
163 tumours growing in the presence or absence of R tumours. We used RNA-Seq to identify  
164 differentially expressed genes in S tumours not treated with erlotinib and S tumors from DI animals  
165 treated with erlotinib. In other words, we compared erlotinib-resistant S tumors (ERS) to erlotinib-  
166 sensitive S tumors (ESS). Differentially expressed genes in ERS and ESS tumours were also  
167 compared with the expression profile of R tumours under the assumption that genes relevant to



168 explain resistance to erlotinib in this specific biological context should be shared between ERS  
169 and R cells.

170 Transcriptome analysis showed that ERS tumours cluster together and are significantly different  
171 from ESS tumours (Fig. 4A). Out of the 2642 differentially expressed genes (FDR  $P < 0.05$ ), we  
172 represented the top 10 differentially expressed genes (Fig. 4B). Using a gene ontology approach,  
173 we observed that endocytosis was the KEGG pathway with the highest number of differentially  
174 expressed genes detected (Fig. 4C, 55 genes,  $P = 2.46E-0.3$ ). Within the endocytosis pathway,  
175 CAV1 and CAV2 were the most significantly overexpressed genes in ERS tumours in comparison  
176 with ESS tumours (CAV1: fold change=7.7x, FDR  $P = 1.23E-0.5$ ; and CAV2: fold change=4.2x,  
177 FDR  $P = 4.9E-0.7$ , Fig. 4D and Fig. S3).

178 Expression analysis through qPCR validated that CAV1 and CAV2 are overexpressed both in ERS  
179 tumours and R tumours, when compared with ESS tumours (Fig. 5A). The same was observed for  
180 protein immunohistochemistry expression, with both ERS tumours and R tumours showing strong  
181 CAV1 and CAV2 expression in tumours cells, whereas in ESS tumours CAV1 and CAV2  
182 expression showed weak and focal expression in tumours cells (Fig. 5B and C).

183

#### 184 **Caveolins are overexpressed in human lung cancers that progress after EGFR-TKI** 185 **treatment**

186 To validate our findings, we compared the immunohistochemical expression of CAV1 and CAV2  
187 in human LC before and after treatment with erlotinib. We selected fifteen cases of LC harbouring  
188 sensitizing EGFR mutations and treated first-line with erlotinib, in which the p.T790M EGFR  
189 mutation was detected as the resistance mechanism, and for which treatment-naïve and post-  
190 progression tissue biopsies were available. CAV1 and CAV2 protein expression was mainly

191 localized in the cell membrane of tumour cells, although some cytoplasmic staining could be  
192 detected as well. Staining in the endothelium and connective tissue was also detected (Fig. 6A).  
193 Out of the 15 pairs of samples analysed for CAV1 expression, 80% were negative before treatment  
194 and 20% showed moderate expression (Fig 6B). CAV2 expression could only be analysed in 10  
195 pairs of cases due to lack of material. 75% of the cases were negative before treatment, 17%  
196 displayed moderate expression and 8% had strong expression (Fig 6B). From pre-treatment to  
197 post-progression samples, we observed a significant increase ( $P=0.007$ ) in CAV1 expression in  
198 67% of the cases: from no to moderate expression in 5 cases; from no to strong expression in 3  
199 cases; and from moderate to strong expression in 2 cases (Fig. 6B, table S2). A significant increase  
200 ( $P=0.04$ ) in CAV2 expression was observed in 60% of the cases: from no to moderate expression  
201 in 3 cases; from no to strong expression in 1 case; and from moderate to strong expression in 2  
202 cases (Fig. 6B, table S2).

203

204 **Table 1.** Allele frequencies determined by NGS in LC samples after disease progression.

| Patient | Biopsy type | EGFR sensitizing mutation                | AF sensitizing mutation | AF p.T790M mutation | Fraction |
|---------|-------------|------------------------------------------|-------------------------|---------------------|----------|
| 1       | Liquid      | c.2239_2256del; p.Leu747_Ser752del       | 0.8%                    | 0.3%                | 62.5%    |
| 2       | Liquid      | c.2573T>G; p.Leu858Arg                   | 65%                     | 29%                 | 55.4%    |
| 3       | Liquid      | c.2235_2249del; p.Glu746_Ala750del       | 13%                     | 3%                  | 76.9%    |
| 4       | Liquid      | c.2235_2249del; p.Glu746_Ala750del       | 3%                      | 0.3%                | 90.0%    |
| 5       | Liquid      | c.2573T>G; p.Leu858Arg                   | 19%                     | 3%                  | 84.2%    |
| 6       | Liquid      | c.2573T>G; p.Leu858Arg                   | 11%                     | 7%                  | 36.4%    |
| 7       | Liquid      | c.2235_2249del; p.Glu746_Ala750del       | 3%                      | 1.8%                | 40.0%    |
| 8       | Liquid      | c.2236_2250del; p.Glu746_Ala750del       | 2.6%                    | 0.8%                | 69.2%    |
| 9       | Liquid      | c.2236_2250del; p.Glu746_Ala750del       | 11.9%                   | 1.7%                | 85.7%    |
| 10      | Liquid      | c.2573T>G; p.Leu858Arg                   | 27.6%                   | 1%                  | 96.4%    |
| 11      | Liquid      | c.2240_2257del; p.Leu747_Pro753delinsSer | 2%                      | 0.6%                | 70.0%    |
| 12      | Liquid      | c.2235_2249del; p.Glu746_Ala750del       | 11%                     | 4.2%                | 61.8%    |
| 13      | Liquid      | c.2240_2257del; p.Leu747_Pro753delInsSer | 1.8%                    | 1.9%                | 0%       |
| 14      | Liquid      | c.2235_2249del; p.Glu746_Ala750del       | 82%                     | 47%                 | 42.7%    |
| 15      | Tissue      | c.2238_2261delinsGCAAC; p.Leu747Glnfs*13 | 61%                     | 10%                 | 83.6%    |
| 16      | Tissue      | c.2573T>G; p.Leu858Arg                   | 20%                     | 6%                  | 70.0%    |
| 17      | Tissue      | c.2240_2257del; p.Leu747_Pro753delInsSer | 24%                     | 18%                 | 25.0%    |
| 18      | Tissue      | c.2235_2249del; p.Glu746_Ala750del       | 29%                     | 7%                  | 75.9%    |
| 19      | Tissue      | c.2235_2249del; p.Glu746_Ala750del       | 40%                     | 14%                 | 65.0%    |
| 20      | Tissue      | c.2235_2249del; p.Glu746_Ala750del       | 84%                     | 10%                 | 88.1%    |
| 21      | Tissue      | c.2573T>G; p.Leu858Arg                   | 53%                     | 25%                 | 52.8%    |
| 22      | Tissue      | c.2235_2249del; p.Glu746_Ala750del       | 31%                     | 8%                  | 74.2%    |
| 23      | Tissue      | c.2573T>G; p.Leu858Arg                   | 26%                     | 2%                  | 92.3%    |
| 24      | Tissue      | c.2573T>G; p.Leu858Arg                   | 41%                     | 1%                  | 97.6%    |
| 25      | Tissue      | c.2235_2249del; p.Glu746_Ala750del       | 45%                     | 24%                 | 46.7%    |
| 26      | Tissue      | c.2240_2257del; p.Leu747_Pro753delInsSer | 15%                     | 3%                  | 80.0%    |
| 27      | Tissue      | c.2236_2250del; p.Glu746_Ala750del       | 60%                     | 16%                 | 73.3%    |
| 28      | Tissue      | c.2236_2250del; p.Glu746_Ala750del       | 14%                     | 7%                  | 50.0%    |

205 AF, allele frequency; Fraction, the fraction of cancer cells that do not carry the resistance mutation  
 206 as inferred by the formula  $(1 - AF_{p.T790M} / AF_{sensitizing})$ .

207

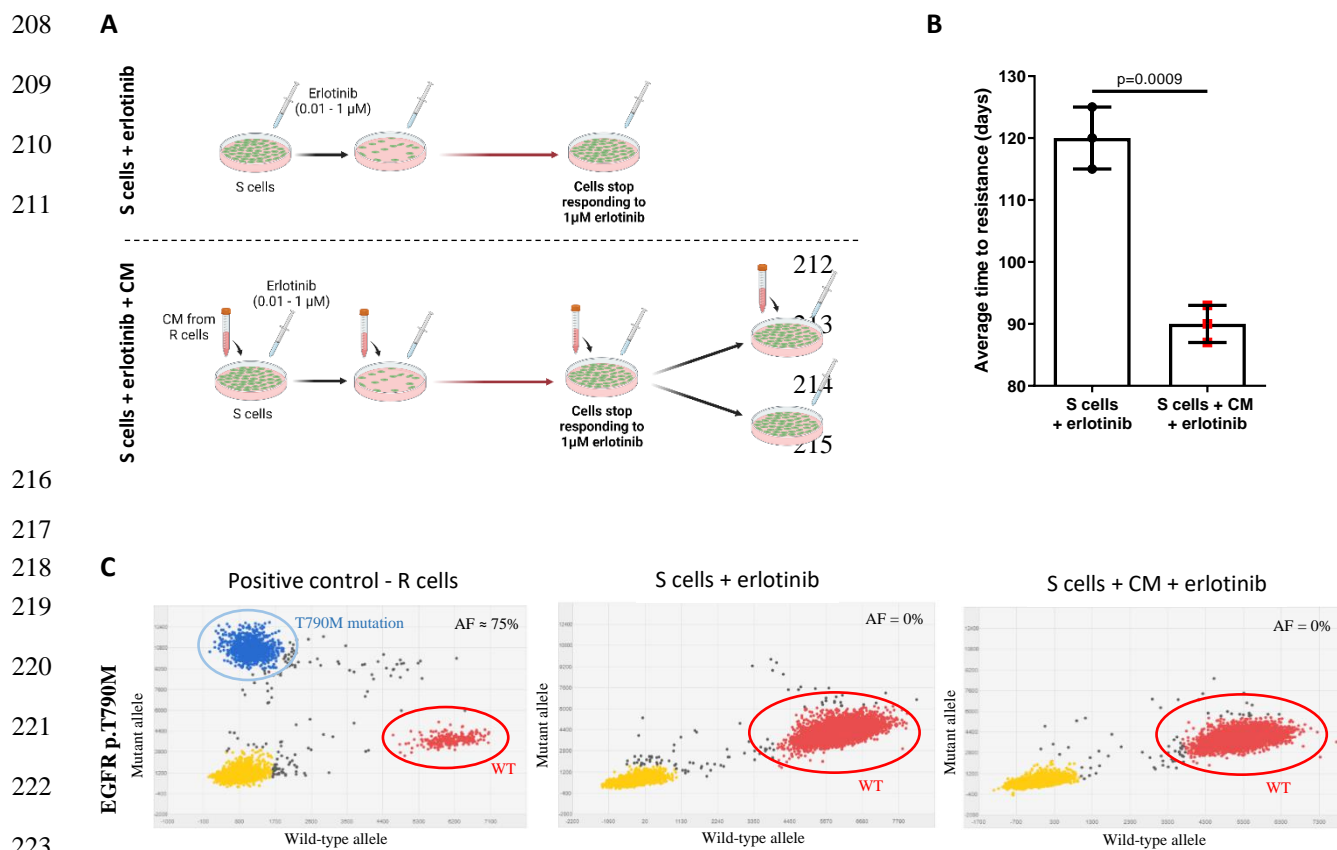

**Figure 1.** R cells accelerate *in vitro* acquisition of resistance to EGFR-TKI by S cells. **(A)** Experimental outline of S cells treated with conditioned media (CM) from R cells, and S cells without CM. In both experiments, S cells were treated with increasing concentrations of erlotinib (0.01-1  $\mu$ M). Resistance was achieved when cells stopped responding to the treatment. CM-treated cells were further divided into two groups, one maintaining the treatment with CM and erlotinib, and the other with erlotinib only. **(B)** Comparison of the average time to resistance in days between CM-treated cells and CM-untreated cells (Mean  $\pm$  SD). **(C)** Digital PCR plots for the p.T790M assay. The *EGFR* p.T790M mutation is not present in DNA from any of the CM-treated or CM-untreated cells: yellow dots represent empty wells; blue dots represent the T790M variant; red dots correspond to the wild-type sequence; and grey dots represent polyclonal wells not considered for analysis. The AF (allelic frequency) is calculated dividing the number of blue dots by the sum of blue and red dots.

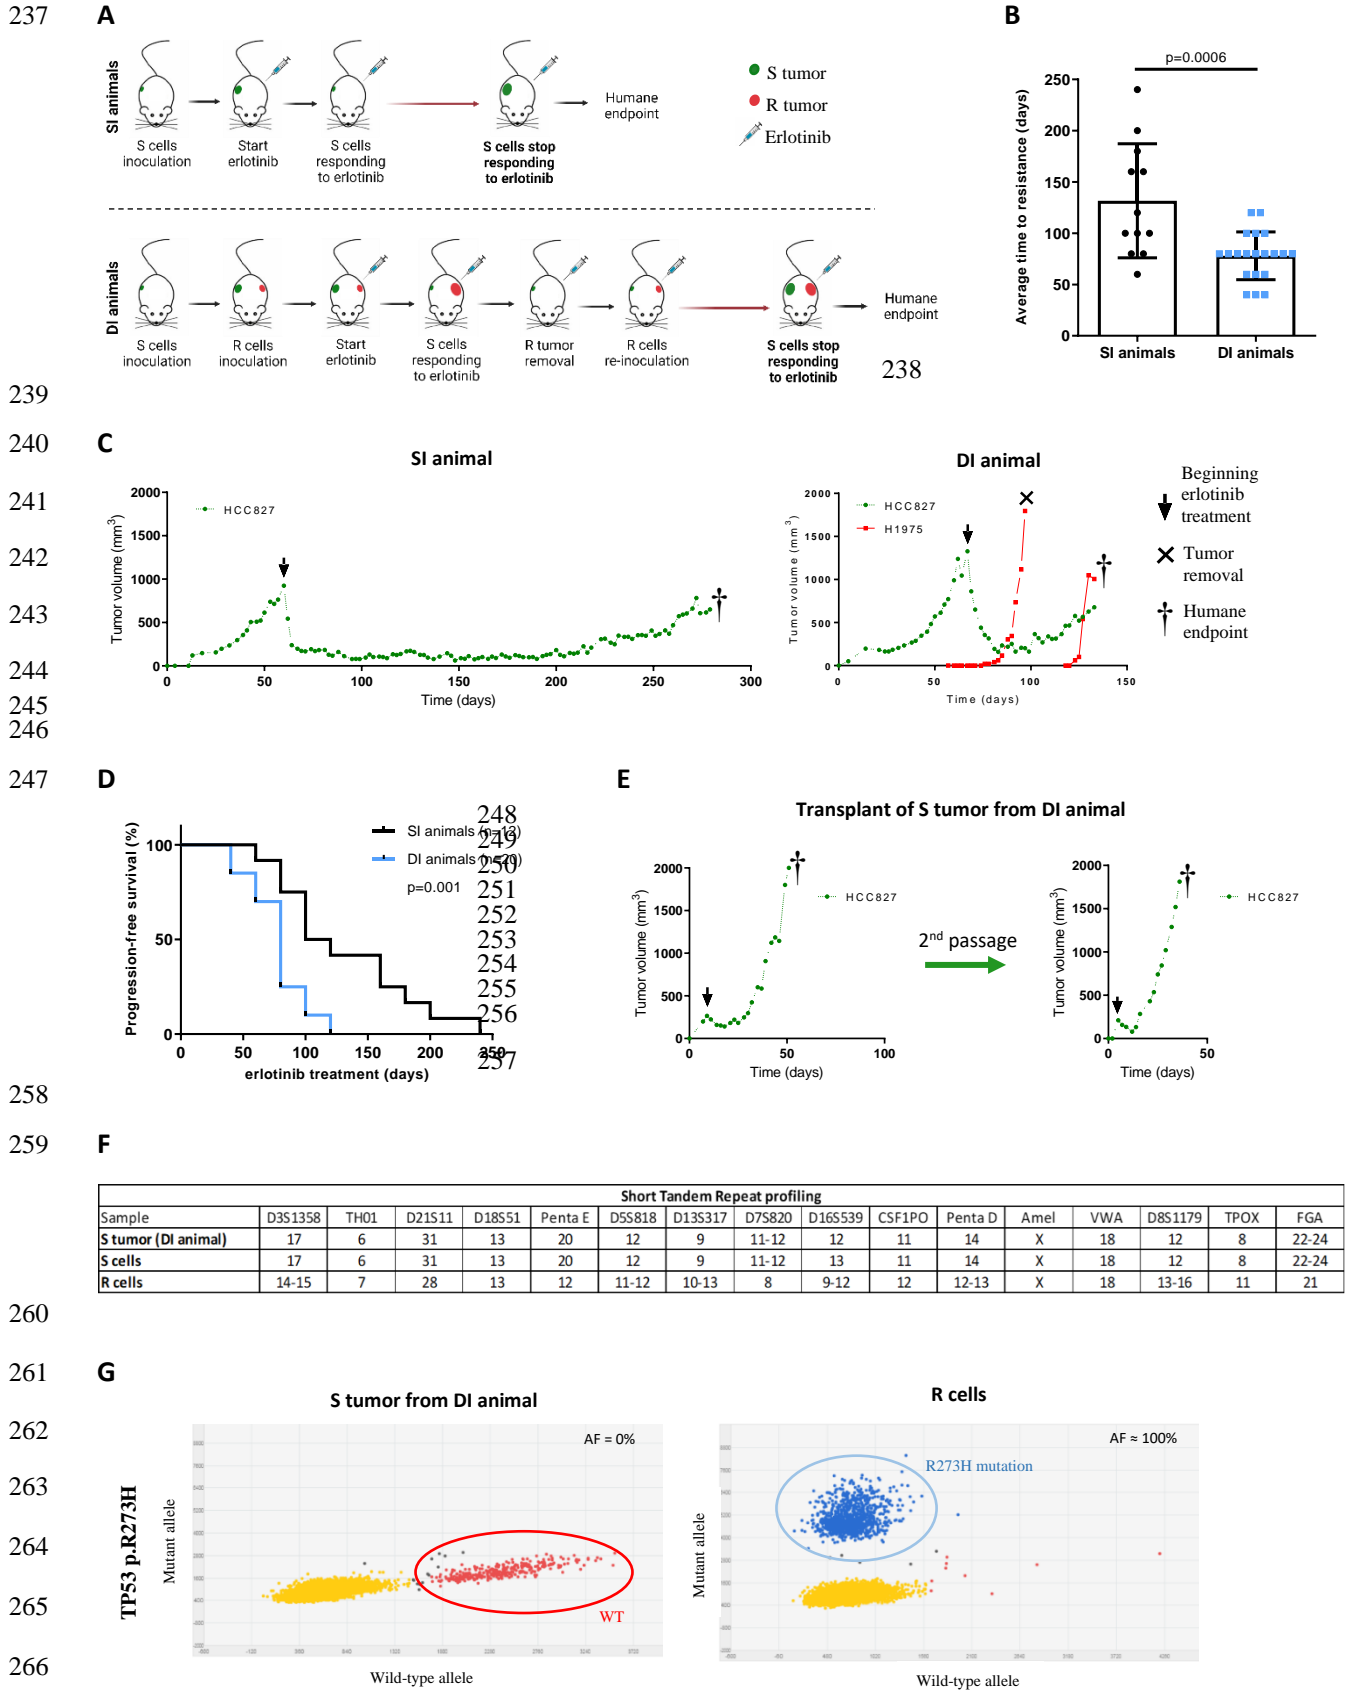

267

268 **Figure 2.** R cells accelerate *in vivo* acquisition of resistance to EGFR-TKI by S cells. (A)  
269 Experimental outline of mice engrafted with S cells inoculated in a single flank (SI animals) and  
270 mice engrafted with S and R cells inoculated in opposite flanks (DI animals) treated with erlotinib  
271 3 times/week by oral gavage. (B) Comparison of the average time to relapse in days between DI  
272 and SI animals (Mean  $\pm$  SD). (C) Tumor growth kinetics of one representative SI and one  
273 representative DI mouse, illustrating that S tumors in DI animals acquire resistance faster. (D)  
274 Progression-free survival curves of SI and DI animals are significantly different ( $P=0.001$ ; Log-  
275 rank Mantel-Cox test). (E) After resistance acquisition, S tumors from DI animals were re-  
276 inoculated into new mice for two passages and erlotinib treatment was maintained during the  
277 whole experiment. (F) Comparison of the STR profile of S tumors from DI animals with the STR  
278 profile of S and R cells. (G) dPCR plots of S tumor from a DI animal negative for the *TP53*  
279 p.R273H mutation and of R cells positive for the *TP53* p.R273H mutation with 100% AF.

280

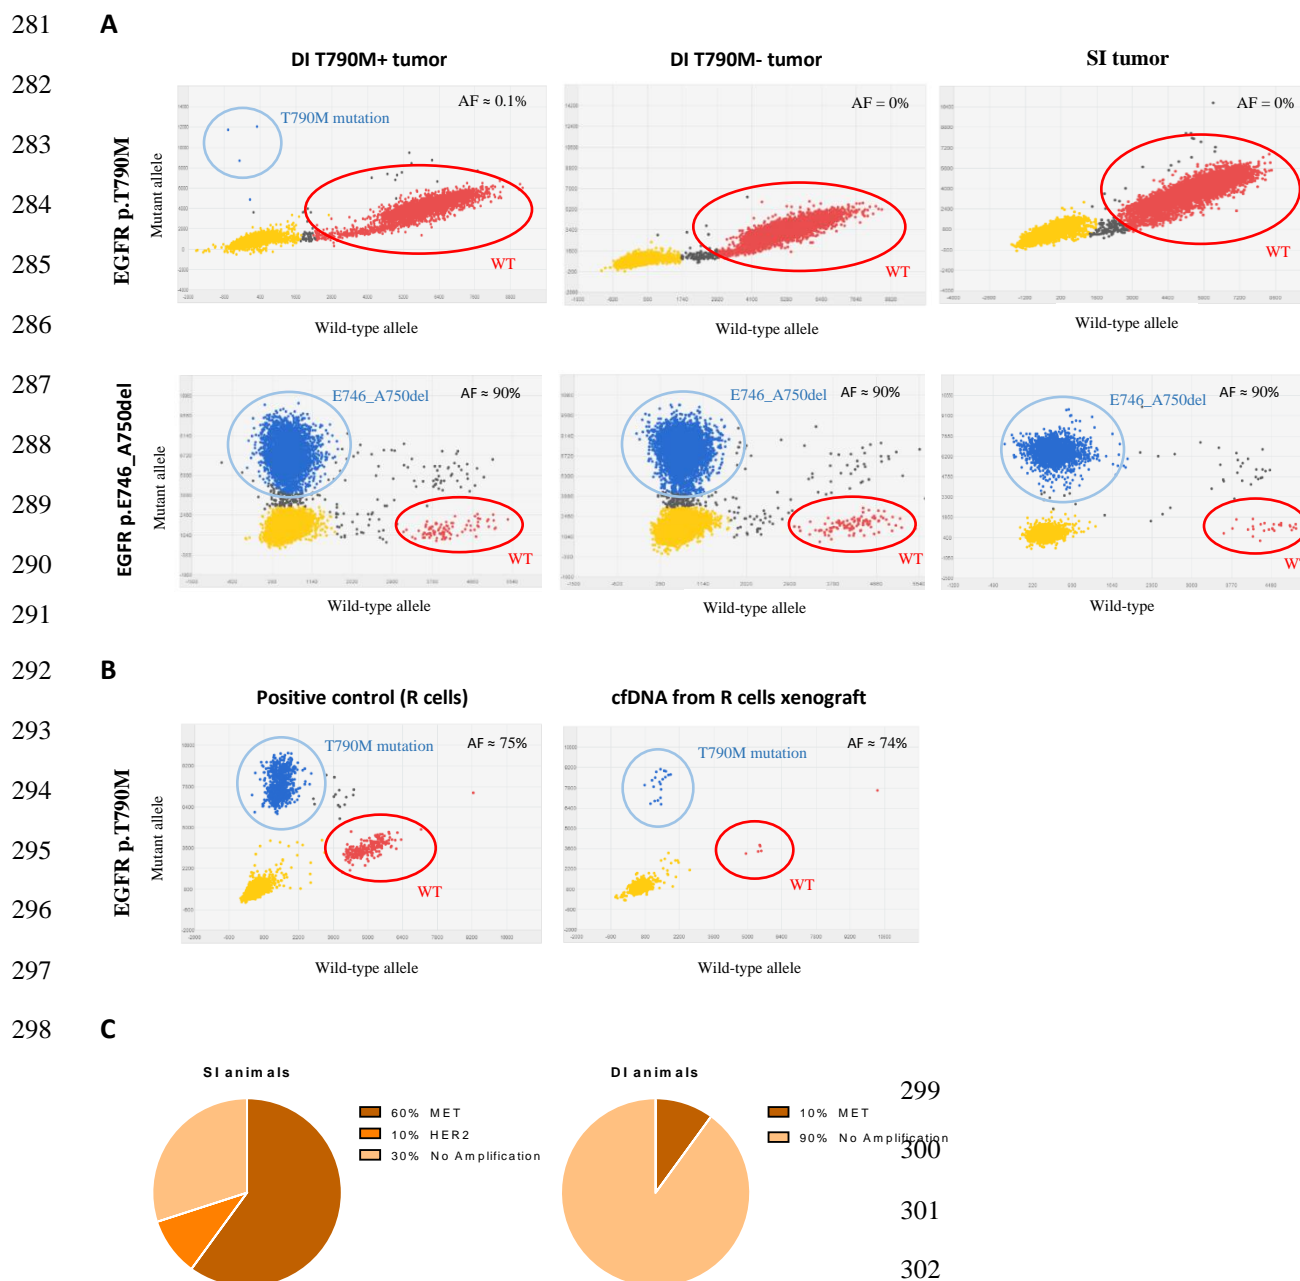

303 **Figure 3.** Detection of resistance mutations to EGFR-TKI in S tumors from SI and DI animals.  
 304 (A) dPCR plots for *EGFR* p.T790M and *EGFR* p.E746\_A750del mutations in representative  
 305 examples of S tumors from SI and DI animals. S tumor from DI animal positive for *EGFR*  
 306 p.T790M mutation with 0.1% AF (left panel); S tumor from DI animal negative for *EGFR*  
 307 p.T790M mutation (middle panel); S tumor from SI animal negative for *EGFR* p.T790M mutation  
 308 (right panel). All samples are positive for the *EGFR* p.E746\_A750del mutation with ≈90% AF.  
 309 (B) dPCR plots for the p.T790M mutation. The *EGFR* p.T790M mutation is present in the cfDNA  
 310 from mice xenografted with R cells (right panel) with an AF similar to that of the parental R cell  
 311 line (left panel). (C) NGS data on *MET* and *HER2* gene amplification in S tumors from SI animals  
 312 (left diagram) and from DI animals (right diagram).

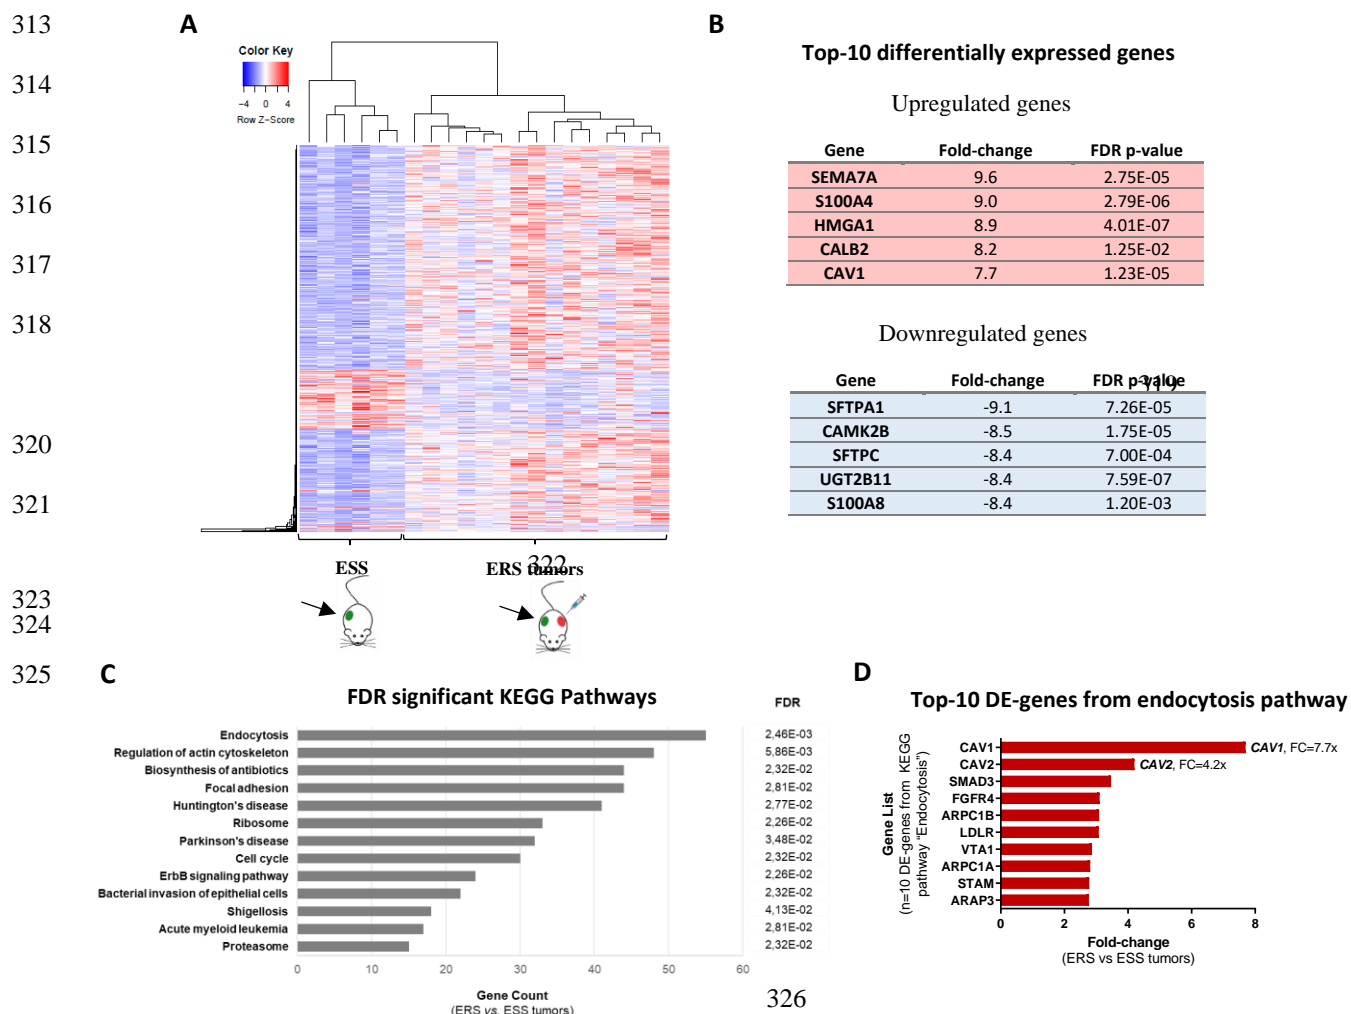

327 **Figure 4.** Identification of endocytosis as the mechanism associated with resistance acquisition in  
 328 ERS tumors. (A) Heatmap for RNA-Seq gene expression profiles for ESS tumors versus ERS  
 329 tumors. FDR p-value <0.05; 2642 differentially expressed (DE) genes. (B) Top-10 DE-genes  
 330 between ERS and ESS tumors (top-5 upregulated genes and top-5 downregulated genes). (C) Gene  
 331 ontology showed endocytosis KEGG pathway as the pathway with the highest number of genes  
 332 detected and the best FDR p-value (55 genes, FDR  $P=2.46E-0.3$ ). (D) Top-10 DE-genes between  
 333 ERS and ESS tumors from the endocytosis KEGG pathway (FDR  $P<0.05$ ). FC – fold change.

334



335

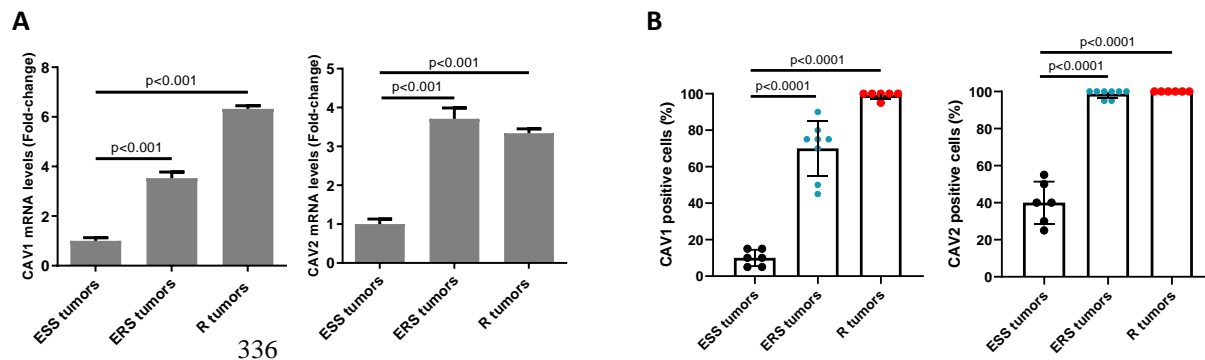

337

338

339

340

341

342

343

344

345

346

347

348

349

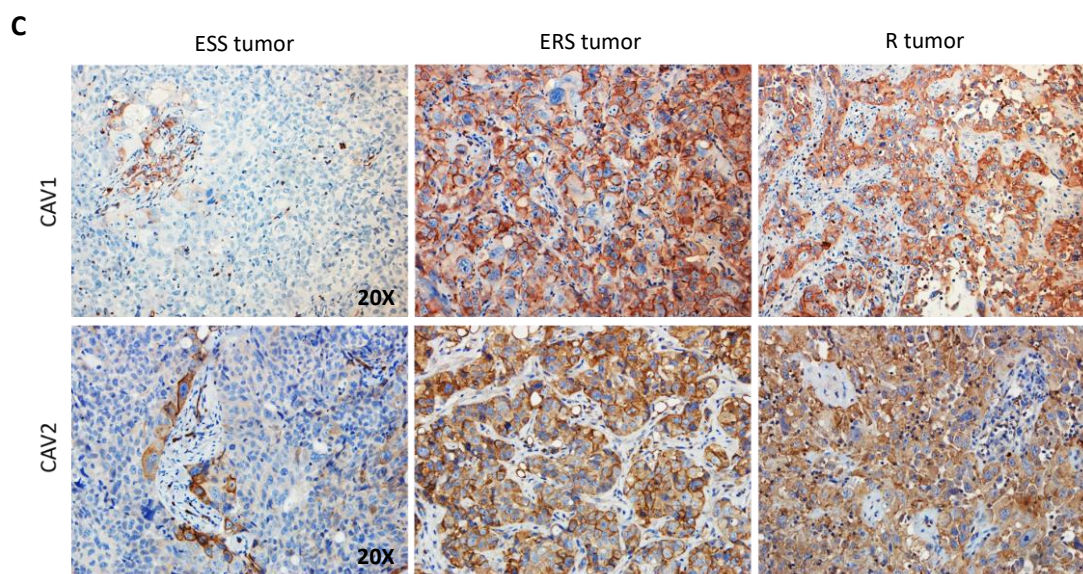

350 **Figure 5.** Validation of increased caveolins expression in ERS tumors by real time PCR and  
 351 immunohistochemistry (IHC). (A) The bars represent the  $2^{-\Delta\Delta Ct}$  as a fold-change of the *CAV1* (left)  
 352 and *CAV2* (right) mRNA expression, normalized to *GUSβ* and *HPRT1*, for ESS tumors, ERS  
 353 tumors and R tumors. (Mean ± SE;  $P < 0.001$ ). (B) Percentage of *CAV1* and *CAV2* protein positive  
 354 cells for ESS tumors, ERS tumors and R tumors (Mean ± SD;  $P < 0.0001$ ). (C) *CAV1* and *CAV2*  
 355 immunohistochemistry expression in representative examples of ESS tumors, ERS tumors and R  
 356 tumors (magnification x200). ESS tumors show weak focal expression in tumor cells and staining  
 357 in perivascular cells; ERS tumors and R tumors show strong and diffuse expression of caveolins  
 358 in tumor cells.

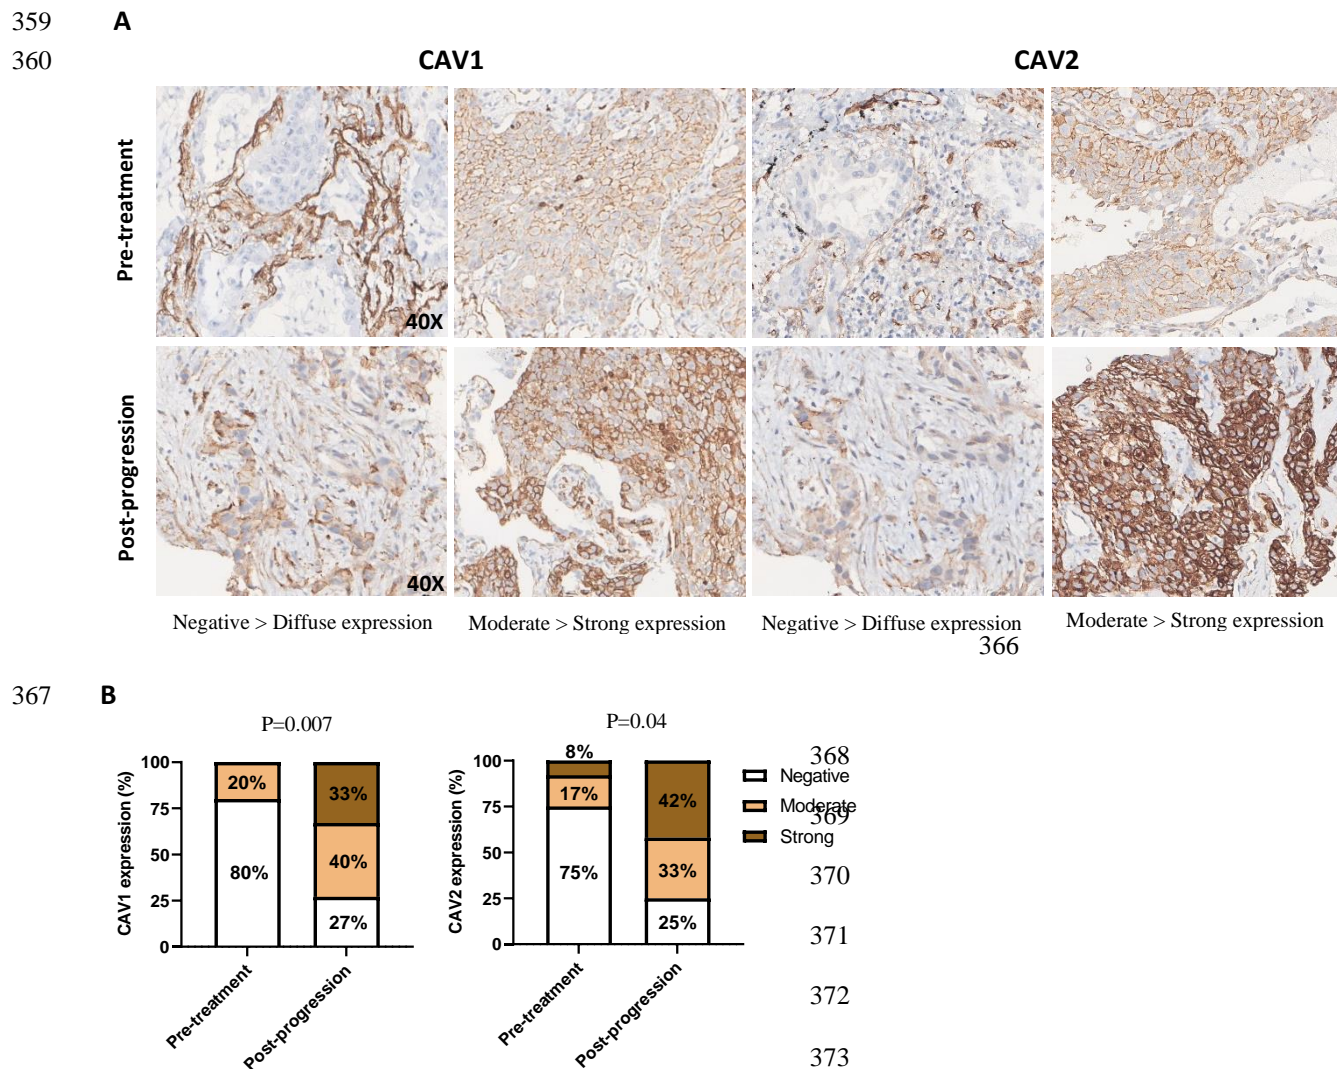

374 **Figure 6.** Increased expression of caveolins in EGFR-mutated human NSCLC after resistance  
 375 acquisition to EGFR-TKI. (A) Microscopy images of CAV1 and CAV2 protein expression  
 376 detected by immunohistochemistry in representative examples of untreated primary NSCLC  
 377 (upper panel) and EGFR-TKI treated, p.T790M mutated relapsing tumors (lower panel)  
 378 (magnification x400). CAV1 and CAV2 protein was mainly localized in the membrane with some  
 379 cytoplasm staining in tumor cells. Endothelium and connective tissue also stained. (B) Percentage  
 380 of pre-treatment and post-progression cases with negative, moderate, and strong expression of  
 381 CAV1 and CAV2.

382

## 383 **DISCUSSION**

384 One of the main implications of our findings is that mutation-driven resistance to targeted therapies  
385 can be transferred among cancer cells. Both *in vitro* and *in vivo* data show that in the presence of  
386 R cells, either using CM or through dual inoculation in the same animal, S cells acquire resistance  
387 faster. In mice, this results in shorter progression-free survival. Most importantly, we show that  
388 acquisition of resistance, as observed in S cells that grow alone (SI animals), is intrinsically  
389 different from what occurs in S cells that grow in DI animals. In the former, 70% of the tumours  
390 present with known EGFR-TKI resistance-associated mutations, namely MET and ERBB2  
391 amplification, whereas in the latter these events are rare, with 90% of the tumours showing no  
392 evidence of mutation-associated resistance mechanisms.

393 Our results challenge the established paradigm that resistance to targeted therapies occurs because  
394 cancer cells harbouring resistance-conferring mutations, which initially exist in small numbers, are  
395 selected, accumulate, and eventually take over the entire tumour cell population through a vertical  
396 transmission model solely reliant on cancer cell division (5). Furthermore, our clinical data on the  
397 AF of sensitizing and resistance mutations shows that in LC patients who relapse after EGFR-TKI  
398 treatment, the p.T790M mutation is present only in a fraction of the relapsing tumour cells.  
399 Assuming equal ploidy for the sensitizing and resistance alleles, as suggested by NGS CNV  
400 analysis, our data indicates that the fraction of cancer cells carrying the resistance mutation  
401 corresponds to about one-third, although this proportion may vary widely. These observations,  
402 support the idea that although resistance stems from a genetic mutation, cancer cells may become  
403 resistant even though they do not carry that mutation, opening the door to a model of cell-to-cell  
404 horizontal transfer of resistance.

405 Horizontal transfer of phenotypes is commonly observed in bacteria, which by exchanging genetic  
406 material, gain new traits such as resistance to antibiotics (22). Horizontal transfer can also take  
407 place in eukaryotes, with exogenous DNA impacting the phenotype of recipient cells via mediators  
408 such as transposons, cfDNA, or extracellular vesicles (EVs) (22). However, the role of horizontal  
409 transfer in cancer is largely unknown. Our results do not support the hypothesis that acquisition of  
410 resistance in S cells “exposed” to R cells is due to genetic transfer of the p.T790M mutation. Even  
411 though the resistance phenotype is stable in S cells, as these cells maintain the capacity to grow *in*  
412 *vitro* and *in vivo* under treatment with erlotinib, the p.T790M mutation originating in R cells could  
413 hardly be detected in S cells. Moreover, even if we accept the remote possibility that DNA coding  
414 for the p.T790M mutation is stably incorporated into the genome of some S cells, endowing them  
415 with resistance to erlotinib, this mechanism alone could not explain the widespread resistance  
416 phenotype observed in the resulting S tumours.

417 We reason that the full blown and stable resistance phenotype observed in our model is triggered  
418 by the p.T790M mutation in R cells, coupled with a continuous flow of molecular information  
419 from R to S cells, and among S cells. It has been shown that EVs carry proteins, RNA transcripts  
420 and other molecular material (23, 24), making it a likely candidate to explain horizontal transfer  
421 of resistance across cancer cells. In fact, EV-mediated transfer of molecules has been shown to  
422 contribute to phenotypic reprogramming and functional re-education of recipient cells (25, 26).  
423 Noteworthy, it has been recently reported that exosomal transfer of wild-type EGFR protein  
424 promotes resistance to osimertinib (a third-generation EGFR-TKI drug) in LC (27).

425 A key finding of our study is the demonstration that horizontal transfer of resistance triggers a  
426 change in the transcriptional landscape of ERS tumours. Pathway analysis showed significant  
427 changes in genes involved in endocytosis, namely overexpression of CAV1 and CAV2.



428 Overexpression was confirmed at the mRNA and protein level in samples from our *in vivo* model  
429 and at the protein level in clinical LC samples. The results obtained in clinical samples are  
430 especially relevant because they correspond exactly to the model of acquisition of resistance to  
431 erlotinib determined by the occurrence of the p.T790M EGFR mutation. In our series, 67% and  
432 60% of the cases showed gain of CAV1 and CAV2 expression, respectively, comparing the pre-  
433 treatment to the post-progression samples.

434 Caveolins are membrane-associated proteins that play a key role in the formation of non-planar  
435 lipid rafts known as caveolae (28). In turn, caveolae are important for signal transduction through  
436 their capacity to selectively concentrate proteins, such as membrane receptors, kinases, and  
437 phosphatases, thereby promoting specific molecular interactions (29). Caveolins are also involved  
438 in intracellular trafficking, including endocytosis, through their localization in distinct cellular  
439 organelles and compartments (30). Caveolins, namely CAV1 and CAV2, have been involved in  
440 cancer with both oncogenic and tumour suppressor properties being described (31). CAV1, for  
441 instance, tends to be expressed in normal cells, downregulated during neoplastic transformation  
442 and first stages of tumour progression, and re-expressed in late stages associated with treatment  
443 resistance and metastasis (31).

444 In LC, increased CAV1 expression was associated with gemcitabine resistance (32), and poor  
445 prognosis (33, 34). Caveolins have also been demonstrated to modulate EGFR activity in cancer  
446 cells. CAV2 was shown to promote the growth of renal cell carcinoma cells through EGFR  
447 signalling (35). *In vitro*, CAV1 was shown to increase LC cell proliferation, migration, and  
448 invasion through EGFR phosphorylation (36). Most importantly, silencing of CAV1 in LC cells  
449 led to enhanced sensitivity to EGFR-TKI drugs by down-regulating phosphorylation of EGFR  
450 (37), directly supporting our contention that the acquisition of resistance to erlotinib is associated

451 with increased CAV1 and CAV2 expression. The precise mechanism linking caveolins to EGFR-  
452 TKI resistance is not known, however, published evidence indicates it is likely to involve increased  
453 EGFR signalling and increased endocytosis. There is evidence that such increase in endocytosis is  
454 accompanied by overexpression and nuclear translocation of both EGFR and other membrane  
455 receptors (30, 38), which in turn may provide survival signals to overcome the inhibitory effect of  
456 EGFR-TKI drugs.

457 In conclusion, our results suggest that the EGFR-TKI resistance phenotype can be transferred from  
458 resistant to sensitive cells both *in vivo* and *in vitro*, resulting in reprogramming of the cells that  
459 acquire resistance. Our findings point out a key role for endocytosis, coupled with caveolae-  
460 associated regulation of signaling and intracellular trafficking, in the acquisition of resistance to  
461 targeted therapies in cancer. Even though our study does not elucidate how transfer of resistance  
462 occurs, or the specific mechanism linking caveolins with EGFR-TKI resistance, we present a  
463 strong case to challenge the current paradigm of cell division and selection as the sole mechanism  
464 underlying transmission of mutation-driven resistance to targeted therapies. In addition, our study  
465 provides a proof of concept to trigger further research on whether these results can be applied to  
466 other models of targeted therapy and mutation-driven acquisition of resistance in cancer.

467

## 468 **MATERIALS AND METHODS**

### 469 **Human samples**

470 Samples from patients with advanced lung adenocarcinoma (unresectable stages IIIB and IV) were  
471 obtained from the Pulmonology Departments of Centro Hospitalar de São João and Centro  
472 Hospitalar de Vila Nova de Gaia/Espinho. Pre- and post-EGFR-TKI treatment tumour tissue  
473 biopsies from 15 LC patients were used for immunohistochemistry. Post-EGFR-TKI treatment  
474 liquid and tissue biopsies from LC patients (14+14) were selected for NGS analysis. Blood  
475 samples were collected in K<sub>2</sub>EDTA tubes (BD Vacutainer® PPT™ Plasma Preparation Tube,  
476 Becton Dickinson, Franklin Lakes, USA). The plasma fraction was separated from the blood cells  
477 by centrifugation at 1200xg during 10min. The collected plasma was aliquoted and stored at -80°C  
478 for cell-free DNA (cfDNA) extraction. Histology and cytology specimens were formalin-fixed and  
479 paraffin-embedded and reviewed by a pathologist.

480

### 481 **Cell lines and cell culture**

482 Human LC cell lines HCC827 (ATCC Cat# CRL-2868™) and H1975 (ATCC Cat# CRL-5908™)  
483 were cultured in RPMI-1640 medium [GIBCO, USA], supplemented with 10% (v/v) foetal bovine  
484 serum (FBS) [GIBCO, USA], 100 U/mL penicillin and 100µg/mL Streptomycin [GIBCO, USA].  
485 Cells were kept at 5% CO<sub>2</sub> and 37°C in a humidified atmosphere. Cells were tested for  
486 mycoplasma during our study and STR profiled.

487

### 488 **Conditioned medium experiment**

489 LC cells sensitive to the EGFR-TKI (S cells) were seeded in a 6-well plate, 2.5x10<sup>5</sup> cells/well.  
490 After 24h, medium from LC cells resistant to the EGFR-TKI (R cells) was collected, centrifuged

491 at 4,000rpm for 10min and filtered using 0.45µm filter, before being added to S cells, together with  
492 0.01µM EGFR-TKI. The EGFR-TKI included in this study was erlotinib [LC Laboratories,  
493 Woburn, MA, USA]. Erlotinib stock solution was prepared in 0.5% [wt/vol] methylcellulose  
494 [Sigma-Aldrich®, St. Louis, MO, USA] and 0.4% [vol/vol] Tween-80 [Sigma-Aldrich®, St.  
495 Louis, MO, USA] solution. Experiments were performed with three replicates per condition.

496

### 497 **LC xenograft model**

498 S cells ( $5 \times 10^6$ ) and R cells ( $1 \times 10^5$ ) were subcutaneously injected into the dorsal flank of 8-12-  
499 weeks-old immunodeficient C57BL/6 *Rag2<sup>-/-</sup>;Il2rg<sup>-/-</sup>* mice. We engrafted S cells in one flank  
500 and once tumours reached a size  $\approx 800\text{mm}^3$ , R cells were engrafted in the opposite flank. When the  
501 S tumours reached  $\approx 1000\text{mm}^3$ , erlotinib was administered (3 times/week, oral gavage, 25mg/kg).  
502 Due to rapid growth of the R tumours, surgery was performed to remove these tumours when it  
503 reached  $1500\text{mm}^3$  of size and after 1-2 weeks of recovery, mice were again engrafted with R cells.  
504 This procedure allowed to follow-up S cell tumours for longer periods of time until acquisition of  
505 resistance to erlotinib. In both groups, animals were sacrificed at humane endpoint. A set of  
506 animals were engrafted with S cells in a single flank and used as control. Tumour size was  
507 measured with callipers every other day and tumour volume calculated by the formula  
508  $\text{length} \times \text{width}^2 / 2$ . Disease progression was defined as an increase of at least 75% in volume with  
509 respect to the minimum tumour volume after treatment. At humane endpoint, mice were  
510 euthanized, and tumours dissected and immersed in 10% formalin, for histological and molecular  
511 analysis.

512

### 513 **DNA extraction**



514 DNA from cells was extracted using DNeasy® Blood & Tissue kit [QIAGEN, Hilden, Germany],  
515 according to manufacturer's instructions. Tumour samples from mice and tissue biopsies from  
516 patients were cut in 10µm sections using the Microm HM 335 E paraffin microtome [GMI,  
517 Ramsey, MN, USA] and 3 sections of each sample were collected. DNA and RNA extraction were  
518 performed using MagMAX™ FFPE DNA/RNA Ultra Kit [Thermo Fisher Scientific, Waltham,  
519 MA, USA], according to manufacturer's instructions.

520 cfDNA from plasma patients was extracted using MagMAX Cell-Free DNA Isolation kit [Applied  
521 Biosystems, Life technologies, Waltham, MA, USA], according to manufacturer's instructions.

522 Fragment distribution and concentration of DNA from plasma was evaluated using 2200  
523 TapeStation [Agilent Technologies, Santa Clara, CA, USA], according to manufacturer's  
524 instructions. The results were analysed with the TapeStation Analysis Software [Invitrogen, Life  
525 technologies, Waltham, MA, USA]. All plasma DNA quantifications were normalized for volume  
526 of plasma collected [cfDNA concentration (ng/mL of plasma) = cfDNA quantification (ng/µL) x  
527 elution volume (µL) / plasma volume (mL)].

528 DNA and RNA concentration were determined using Qubit® 2.0 Fluorometer [Invitrogen, Life  
529 technologies, Waltham, MA, USA], double stranded DNA high sensitivity (HS) or RNA HS assay,  
530 according to manufacturer's instructions.

531

### 532 **DNA fingerprinting**

533 DNA from cells was amplified through PCR with primers for the following locus: Penta E,  
534 D18S51, D21S11, THO1, D3S1358, FGA, TPOX, D81179, vWA, Amelogenin, Penta D,  
535 CSF1PO, D16S539, D7S820, D14s317 and D5S818 with the Powerplex 16 HS system, that allows  
536 the co-amplification and simultaneous detection of the 16 described loci. The amplified fragments

537 were then detected with capillary electrophoresis using the 3500 Genetic Analyser sequencer  
538 [Applied Biosystems] and the genotypes were assigned with the GeneMapper v5.0 [Applied  
539 Biosystems].

540

#### 541 **Next Generation Sequencing (NGS)**

542 NGS libraries were prepared using the Oncomine™ Lung cfDNA Assay for mouse xenografts and  
543 for human liquid biopsies, and the Oncomine™ Focus Assay for human tissue biopsies according  
544 to the manufacturer's instructions [Thermo Fisher Scientific, Waltham, MA, USA]. The resulting  
545 libraries were purified using Agencourt AMPure XP [Beckman Coulter] and quantified by qPCR  
546 using the Ion Library TaqMan® Quantitation Kit [Thermo Fisher Scientific, Waltham, MA, USA],  
547 according with the manufacturer instructions. The quantified stock libraries were then diluted to  
548 50pM, pooled and loaded onto Ion 530™ or 540™ chips using Ion Chef™ for templating [Thermo  
549 Fisher Scientific, Waltham, MA, USA] and the loaded chips were then sequenced in a S5XL  
550 sequencer. The sequencing quality was assessed through the coverage analysis plugin and the  
551 samples were analysed with Ion Reporter 5.6. Raw data was processed automatically on the  
552 Torrent Server™ and aligned to the reference hg19 genome.

553

#### 554 **Digital PCR**

555 TaqMan Mutation Detection Assays [Thermo Fisher Scientific, Waltham, MA, USA] were used  
556 on a Quantstudio 3D digital PCR system [Thermo Fisher Scientific, Waltham, MA, USA] to  
557 confirm variants with low allelic frequencies. This approach was used to detect specific alterations,  
558 with specific probes for each mutation, namely the Hs000000029\_rm (for *EGFR* p.T790M  
559 mutation), Hs000000026\_rm (for *EGFR* p.L858R mutation), Hs000000027\_rm (for *EGFR*

560 p.E746-A750 deletion) and Hs00001004\_mu (for TP53 p.R273H mutation). The results were  
561 analysed with QuantStudio™ 3D AnalysisSuite™ Software.

562

### 563 **RNA-Seq**

564 The integrity and quality of RNA was analysed using the Agilent 2100 Bioanalyzer [Agilent  
565 Technologies, Santa Clara, CA, USA]. RNA was converted to cDNA using the SuperScript VILO  
566 cDNA Synthesis Kit [Thermo Fisher Scientific, Waltham, MA, USA]. cDNA was amplified and  
567 library constructed with Ion AmpliSeq Transcriptome Human Gene Expression Kit [ThermoFisher  
568 Scientific, Waltham, MA, USA]. Samples were then prepared for deep sequencing using the Ion  
569 Chef™ System [Thermo Fisher Scientific, Waltham, MA, USA], loaded into the Ion 550 Chip,  
570 and sequenced using the Ion S5 XL Sequencer [Thermo Fisher Scientific, Waltham, MA, USA].  
571 Sequencing quality was assessed through the plug-in coverage analysis and samples were analysed  
572 on the torrent Suite™ Software [Thermo Fisher Scientific, Waltham, MA, USA]. Differentially  
573 expressed genes between groups were identified using the Transcriptome Analysis Console  
574 Software v4.0.2 [Thermo Fisher Scientific, Waltham, MA, USA] using a double threshold based  
575 on fold-change ( $\geq 1$  or  $\leq -1$ ) and statistical significance of the change with FDR p-value  $\leq 0.05$ .  
576 DAVID webtool was used to determine significantly enriched gene ontology terms and pathways.

577

### 578 **Real time PCR**

579 RNA was converted to cDNA using the SuperScript VILO cDNA Synthesis Kit [Thermo Fisher  
580 Scientific, Waltham, MA, USA], according to manufacturer's instructions. The reactions were  
581 carried out in a StepOnePlus™ qPCR Real-Time PCR machine, in a volume of 10µL containing  
582 1x TaqMan™ Fast Advanced Master mix [Applied Biosystems], with 1x TaqMan™ Advanced

583 Assays probes Hs00971716\_m1 and Hs00184597\_m1 [Applied Biosystems] specific for the *CAVI*  
584 and *CAV2* gene, respectively, and 2.5µL cDNA. For mRNA expression normalization, two  
585 housekeeping controls were used: HPRT1 and GUSB [Applied Biosystems]. The  $2^{-\Delta\Delta CT}$  method  
586 was applied to analyse the relative change in gene expression. Three technical replicates were  
587 made for each sample.

588

### 589 **Immunohistochemistry**

590 Tissue sections were obtained in coated slides [Thermo Scientific, Waltham, MA, USA], 3µm  
591 each section, using the Microm HM 335 E paraffin microtome [GMI, Ramsey, MN, USA]  
592 followed by incubation at 65°C for 1h. Each section was probed overnight at 4°C with an optimized  
593 concentration of the anti-CAV1 (Sigma-Aldrich®, catalog #HPA049326, 1:1000) and anti-CAV2  
594 (Novus Biologicals, catalog #NBP2-98731, 1:500) polyclonal antibodies diluted in antibody  
595 diluent [Thermo Scientific, Waltham, MA, USA]. CAV1 and CAV2 proteins were detected by  
596 peroxidase-DAB (diaminobenzidine) chemistry using the REAL EnVision detection system kit  
597 [Dako, Glostrup, Denmark]. CAV1 and CAV2 immunoreactivity was classified as: (1) negative,  
598 when tumour cells showed complete loss of expression; (2) moderate, when less than 50% of the  
599 tumour cells showed preserved membrane expression, or, irrespective of the percentage of cells,  
600 weaker membrane staining compared with the control; or (3) strong, when more than 50% of the  
601 tumour cells showed preserved membrane expression.

602

### 603 **Statistical analysis**

604 All statistical analyses were performed with GraphPad Prism [GraphPad Prism,  
605 RRID:SCR\_002798], SPSS Statistics V27 Release 27.0.1.0. [IBM, RRID:SCR\_019096] or R

606 software package (<https://www.r-project.org>). The data were showed as means  $\pm$  standard  
607 deviation (SD) and analysed by Student's *t*-test analysis unless otherwise indicated. Log-Rank  
608 (Mantel-Cox) test was used to compare progression-free survival onset between different mice  
609 models. Pearson correlations between gene expressions of CAV1 and CAV2 were performed using  
610 the "cor.test" package in R.  
611

612 **List of Supplementary Materials**

613 Figs. S1 to S3.

614 Tables S1 and S2.

615

616 **References and Notes**

- 617 1. C. Sawyers, Targeted cancer therapy. *Nature* **432**, 294-297 (2004).
- 618 2. D. Gonzalez de Castro, P. A. Clarke, B. Al-Lazikani, P. Workman, Personalized cancer  
619 medicine: molecular diagnostics, predictive biomarkers, and drug resistance. *Clin*  
620 *Pharmacol Ther* **93**, 252-259 (2013).
- 621 3. D. R. Camidge, W. Pao, L. V. Sequist, Acquired resistance to TKIs in solid tumours:  
622 learning from lung cancer. *Nat Rev Clin Oncol* **11**, 473-481 (2014).
- 623 4. L. A. Garraway, P. A. Janne, Circumventing cancer drug resistance in the era of  
624 personalized medicine. *Cancer Discov* **2**, 214-226 (2012).
- 625 5. B. G. Blair, A. Bardelli, B. H. Park, Somatic alterations as the basis for resistance to  
626 targeted therapies. *J Pathol* **232**, 244-254 (2014).
- 627 6. C. B. Meador *et al.*, Optimizing the sequence of anti-EGFR-targeted therapy in EGFR-  
628 mutant lung cancer. *Mol Cancer Ther* **14**, 542-552 (2015).
- 629 7. N. McGranahan, C. Swanton, Clonal Heterogeneity and Tumor Evolution: Past, Present,  
630 and the Future. *Cell* **168**, 613-628 (2017).
- 631 8. C. Grassberger *et al.*, Patient-Specific Tumor Growth Trajectories Determine Persistent  
632 and Resistant Cancer Cell Populations during Treatment with Targeted Therapies.  
633 *Cancer Res* **79**, 3776-3788 (2019).

- 634 9. N. Wagle *et al.*, Dissecting therapeutic resistance to RAF inhibition in melanoma by  
635 tumor genomic profiling. *J Clin Oncol* **29**, 3085-3096 (2011).
- 636 10. M. G. O. Fernandes *et al.*, Liquid Biopsy for Disease Monitoring in Non-Small Cell Lung  
637 Cancer: The Link between Biology and the Clinic. *Cells* **10**, (2021).
- 638 11. C. Karlovich *et al.*, Assessment of EGFR Mutation Status in Matched Plasma and Tumor  
639 Tissue of NSCLC Patients from a Phase I Study of Rociletinib (CO-1686). *Clin Cancer*  
640 *Res* **22**, 2386-2395 (2016).
- 641 12. C. Gridelli *et al.*, Non-small-cell lung cancer. *Nat Rev Dis Primers* **1**, 15009 (2015).
- 642 13. R. S. Herbst, D. Morgensztern, C. Boshoff, The biology and management of non-small  
643 cell lung cancer. *Nature* **553**, 446-454 (2018).
- 644 14. R. Rosell *et al.*, Erlotinib versus standard chemotherapy as first-line treatment for  
645 European patients with advanced EGFR mutation-positive non-small-cell lung cancer  
646 (EURTAC): a multicentre, open-label, randomised phase 3 trial. *Lancet Oncol* **13**, 239-  
647 246 (2012).
- 648 15. M. Reck *et al.*, Erlotinib in advanced non-small cell lung cancer: efficacy and safety  
649 findings of the global phase IV Tarceva Lung Cancer Survival Treatment study. *J Thorac*  
650 *Oncol* **5**, 1616-1622 (2010).
- 651 16. G. Recondo, F. Facchinetti, K. A. Olaussen, B. Besse, L. Friboulet, Making the first  
652 move in EGFR-driven or ALK-driven NSCLC: first-generation or next-generation TKI?  
653 *Nat Rev Clin Oncol* **15**, 694-708 (2018).
- 654 17. S. M. Lim, N. L. Syn, B. C. Cho, R. A. Soo, Acquired resistance to EGFR targeted  
655 therapy in non-small cell lung cancer: Mechanisms and therapeutic strategies. *Cancer*  
656 *Treat Rev* **65**, 1-10 (2018).

- 657 18. H. A. Yu *et al.*, Analysis of tumor specimens at the time of acquired resistance to EGFR-  
658 TKI therapy in 155 patients with EGFR-mutant lung cancers. *Clin Cancer Res* **19**, 2240-  
659 2247 (2013).
- 660 19. C. H. Yun *et al.*, The T790M mutation in EGFR kinase causes drug resistance by  
661 increasing the affinity for ATP. *Proc Natl Acad Sci U S A* **105**, 2070-2075 (2008).
- 662 20. J. A. Engelman *et al.*, MET amplification leads to gefitinib resistance in lung cancer by  
663 activating ERBB3 signaling. *Science* **316**, 1039-1043 (2007).
- 664 21. K. Takezawa *et al.*, HER2 amplification: a potential mechanism of acquired resistance to  
665 EGFR inhibition in EGFR-mutant lung cancers that lack the second-site EGFR T790M  
666 mutation. *Cancer Discov* **2**, 922-933 (2012).
- 667 22. M. Emamalipour *et al.*, Horizontal Gene Transfer: From Evolutionary Flexibility to  
668 Disease Progression. *Front Cell Dev Biol* **8**, 229 (2020).
- 669 23. S. A. Melo *et al.*, Cancer exosomes perform cell-independent microRNA biogenesis and  
670 promote tumorigenesis. *Cancer Cell* **26**, 707-721 (2014).
- 671 24. C. F. Ruivo, B. Adem, M. Silva, S. A. Melo, The Biology of Cancer Exosomes: Insights  
672 and New Perspectives. *Cancer Res* **77**, 6480-6488 (2017).
- 673 25. F. T. Borges *et al.*, TGF-beta1-containing exosomes from injured epithelial cells activate  
674 fibroblasts to initiate tissue regenerative responses and fibrosis. *J Am Soc Nephrol* **24**,  
675 385-392 (2013).
- 676 26. C. Kahlert *et al.*, Identification of double-stranded genomic DNA spanning all  
677 chromosomes with mutated KRAS and p53 DNA in the serum exosomes of patients with  
678 pancreatic cancer. *J Biol Chem* **289**, 3869-3875 (2014).



- 679 27. S. Wu *et al.*, Intercellular transfer of exosomal wild type EGFR triggers osimertinib  
680 resistance in non-small cell lung cancer. *Mol Cancer* **20**, 17 (2021).
- 681 28. M. Raudenska, J. Gumulec, J. Balvan, M. Masarik, Caveolin-1 in oncogenic metabolic  
682 symbiosis. *Int J Cancer* **147**, 1793-1807 (2020).
- 683 29. K. Simons, D. Toomre, Lipid rafts and signal transduction. *Nat Rev Mol Cell Biol* **1**, 31-  
684 39 (2000).
- 685 30. H. N. Fridolfsson, D. M. Roth, P. A. Insel, H. H. Patel, Regulation of intracellular  
686 signaling and function by caveolin. *FASEB J* **28**, 3823-3831 (2014).
- 687 31. J. Ketteler, D. Klein, Caveolin-1, cancer and therapy resistance. *Int J Cancer* **143**, 2092-  
688 2104 (2018).
- 689 32. C. C. Ho *et al.*, Caveolin-1 expression is significantly associated with drug resistance and  
690 poor prognosis in advanced non-small cell lung cancer patients treated with gemcitabine-  
691 based chemotherapy. *Lung Cancer* **59**, 105-110 (2008).
- 692 33. S. H. Yoo *et al.*, Expression of caveolin-1 is associated with poor prognosis of patients  
693 with squamous cell carcinoma of the lung. *Lung Cancer* **42**, 195-202 (2003).
- 694 34. F. Han, J. Zhang, J. Shao, X. Yi, Caveolin-1 promotes an invasive phenotype and predicts  
695 poor prognosis in large cell lung carcinoma. *Pathol Res Pract* **210**, 514-520 (2014).
- 696 35. F. Liu, Z. Shangli, Z. Hu, CAV2 promotes the growth of renal cell carcinoma through the  
697 EGFR/PI3K/Akt pathway. *Onco Targets Ther* **11**, 6209-6216 (2018).
- 698 36. T. Y. Luan *et al.*, Expression of caveolin-1 is correlated with lung adenocarcinoma  
699 proliferation, migration, and invasion. *Med Oncol* **32**, 207 (2015).

- 700 37. Y. Cui *et al.*, Downregulation of caveolin-1 increased EGFR-TKIs sensitivity in lung  
701 adenocarcinoma cell line with EGFR mutation. *Biochem Biophys Res Commun* **495**, 733-  
702 739 (2018).
- 703 38. S. C. Wang, M. C. Hung, Nuclear translocation of the epidermal growth factor receptor  
704 family membrane tyrosine kinase receptors. *Clin Cancer Res* **15**, 6484-6489 (2009).
- 705
- 706

707 **Acknowledgments:**

708 We thank Dr Nuno Alves, i3S, Porto, Portugal and Dr James Di Santo, Institute Pasteur, Paris,  
709 France, for kindly gifting the Ilrg2<sup>-/-</sup>. We thank Dr. Dina Leitão for assistance in the  
710 immunohistochemistry staining. Elaboration of figures 1A and 2A was performed using  
711 BioRender.com.

712

713 **Funding:**

714 This research was funded (in part) by FCT - Fundação para a Ciência e a Tecnologia/Ministério  
715 da Ciência, Tecnologia e Ensino Superior in the framework of the projects “Financiamento  
716 Plurianual de Unidades de I&D, UIBD/04293/2020”, “Horizontal transmission of drug resistance:  
717 a game changer in the clinical management of cancer patients” (P2020-PTDC/DTP-  
718 PIC/2500/2014), and SFRH/BD/115099/2016 (SJN PhD fellowship), and (in part) by Programa  
719 Operacional Regional do Norte by European Regional Development Fund under the project "The  
720 Porto Comprehensive Cancer Center" with the reference NORTE-01-0145-FEDER-072678 -  
721 Consórcio PORTO.CCC – Porto.Comprehensive Cancer Center.

722

723 **Author contributions:**

724 Conceptualization: SJN, SAM, JLC and JCM

725 *In vitro* and *in vivo* experiments: SJN, ARO, JFM, MS, BA

726 Other methodology: SJN, ARO, JFM, JP, CSM, JCM, PO.

727 Analysis of results: SJN, ARO, JFM, PO, LP, BC, JP, CSM, JLC, JCM

728 Selection of clinical samples and analysis of clinical data: AB, VH, MGOF, CSM, JLC, JCM

729 Funding acquisition: JLC, JCM.

730 Writing - original draft: SJN, JCM.

731 Writing – review & editing: all authors

732

733 **Competing interests:**

734 SAM holds patents in EVs biology that are licensed to Codiak Biosciences. The other authors  
735 declare no competing interests.

736

737 **Data and materials availability:**

738 All data, except for RNASeq raw data, are available in the main text or the supplementary  
739 materials. The RNASeq datasets used and/or analyzed during the current study are available from  
740 the corresponding author upon request.

741

742 **Ethics approval and informed consent:**

743 The study was conducted according to the guidelines of the Declaration of Helsinki. Ethical review  
744 and approval were waived as the study is in accordance with Article 19 (“DNA Banks and Other  
745 Biological Products”) of Portuguese Law No. 12/2005 of 26 January (“Personal genetic  
746 information and health information”), which states that in the case of using retrospective samples  
747 from human origin or in special situations where the consent of the people involved cannot be  
748 obtained because of the amount of data or subjects, of their age, or another reason comparable,  
749 material and data can be processed but only for purposes of scientific research or epidemiological  
750 and statistical data collection.

751 Animal studies were approved by the national authority Direção Geral de Alimentação e  
752 Veterinária (DGAV reference 0421/000/000/2017) and reviewed by the i3S Animal Welfare and

753 Ethics Body (reference 2016/22). All mice were housed under standard housing conditions at the  
754 i3S animal facility.
